# Supplementary material for: Sociodemographic differences in single, dual, and poly tobacco use among Appalachian youth
Source: PubMed Central journal article supplement — Tob Prev Cessat. 2020 Jul 28;6:45. doi: 10.18332/tpc/124782 (PMC7549506; doi:10.18332/tpc/124782), 2020-07-28
Supplement: TPC-6-45-s1.pdf [file TPC-6-45-s1.pdf]

**Supplementary Table 1.** Prevalence of Patterns of Tobacco Use, the Youth Appalachian Tobacco Study (n = 1116)

|                                    | n   | %    | 95% LB | 95% UB |
|------------------------------------|-----|------|--------|--------|
| Never use                          | 738 | 66.1 | 63.3   | 68.9   |
| Former use                         | 181 | 16.2 | 14.1   | 18.4   |
| Single use                         | 120 | 10.8 | 8.9    | 12.6   |
| Cigarettes only                    | 35  | 3.1  | 2.1    | 4.2    |
| E-cigarettes only                  | 44  | 3.9  | 2.8    | 5.1    |
| Smokeless tobacco only             | 41  | 3.7  | 2.6    | 4.8    |
| Dual use                           | 50  | 4.5  | 3.3    | 5.7    |
| Cigarettes + e-cigarettes          | 21  | 1.9  | 1.1    | 2.7    |
| Cigarettes + smokeless tobacco     | 23  | 2.1  | 1.2    | 2.9    |
| E-cigarettes + smokeless tobacco   | 6   | 0.5  | 0.1    | 1.0    |
| Poly use (all three products)      | 27  | 2.4  | 1.5    | 3.3    |
| Multiple product use (dual + poly) | 77  | 6.9  | 5.4    | 8.4    |

Notes -- LB: Lower bound; UB: Upper bound
